# Supplementary material for: Evaluation of Antiviral Compounds from <em>Commiphora molmol</em> Myrrh Resin and Their Promising Application with Biochar
Source: Preprints.org preprint supplement (doi:10.20944/preprints202308.0276.v1), 2023-08-03
Supplement: Supplementary file 1 [file supplementary]

Supplementary information

Table S1. BET surface area of RH-BC and WD-BC

| Biochar | BET surface area (m2/g) |
| --- | --- |
| WD-BC | 211.14 |
| RH-BC | 205.60 |


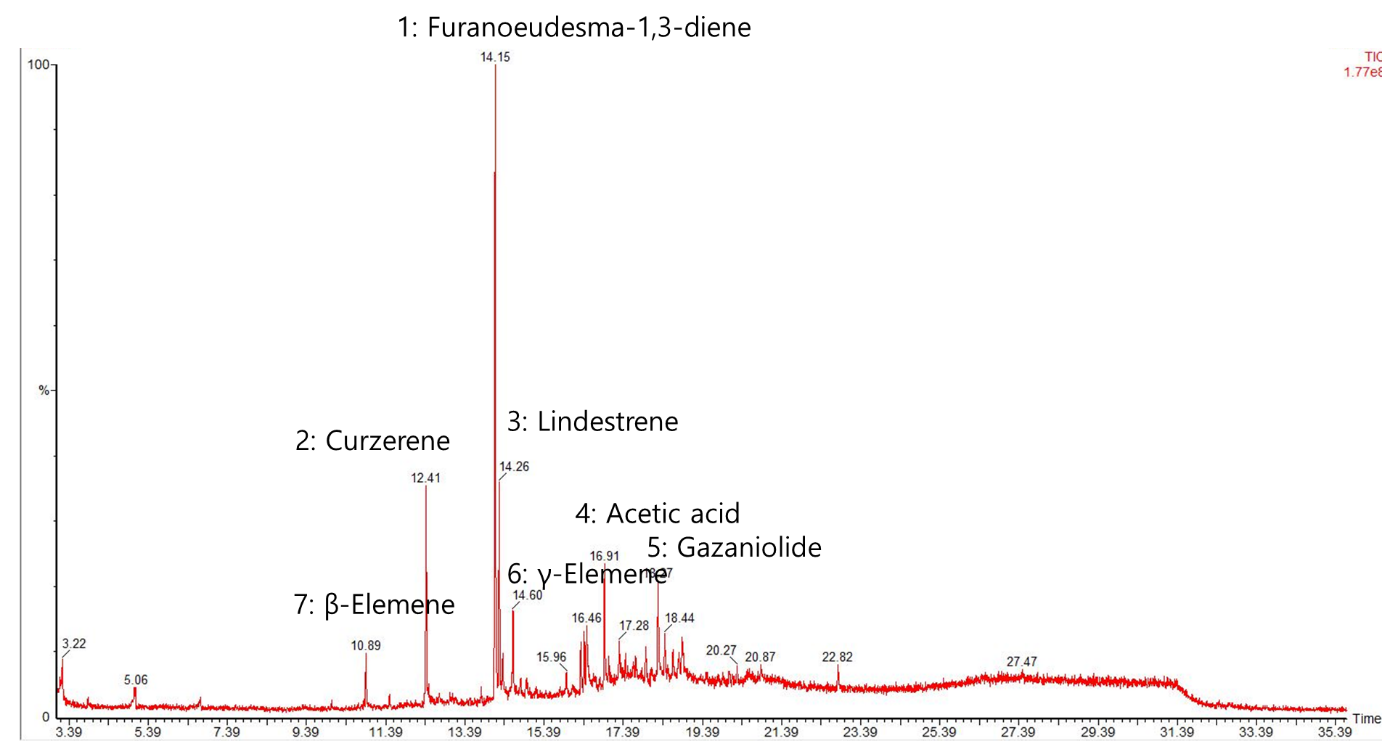


Fig. S1. GC-MS spectra of myrrh resin extracts for terpenes analysis.

Fig. S2. FTIR spectra of RH-BC and WD-BC before myrrh resin extracts adsorption.
